# Supplementary material
Source: publisher site journal article supplement (https://www.dovepress.com/article/513779)
Supplement: Supplementary file 1 [file 513779%20Revised%20Supplementary%20Tables%201-2.docx]

Supplementary Table 1: The ADC values of the study population

| ADC values (mm2/s) | Total (n=1376) | Development  cohort (n=963) | Validation  cohort (n=413) | *p* value |
| --- | --- | --- | --- | --- |
| ADC 500 maximium | 1.72 [1.48; 2.02] | 1.73 [1.48; 2.04] | 1.71 [1.45; 1.98] | 0.31 |
| ADC 500 minimium | 0.75 [0.59; 0.91] | 0.75 [0.59; 0.91] | 0.75 [0.59; 0.92] | 0.71 |
| ADC 500 average | 1.10 [0.96; 1.27] | 1.10 [0.97; 1.27] | 1.10 [0.96; 1.26] | 0.73 |
| ADC 500 standard deviation | 0.18 [0.13; 0.25] | 0.18 [0.13; 0.25] | 0.18 [0.13; 0.23] | 0.18 |
| ADC 500 relative deviation | 160.00 [117.00; 221.00] | 161.00 [116.00; 228.00] | 155.00 [117.00; 209.00] | 0.19 |
| ADC 1000 maximium | 1.46 [1.24; 1.72] | 1.46 [1.25; 1.71] | 1.44 [1.23; 1.73] | 0.48 |
| ADC 1000 minimium | 0.67 [0.54; 0.80] | 0.67 [0.54; 0.80] | 0.68 [0.55; 0.82] | 0.36 |
| ADC 1000 average | 0.93 [0.82; 1.07] | 0.93 [0.83; 1.07] | 0.93 [0.82; 1.09] | 0.92 |
| ADC 1000 standard deviation | 0.14 [0.10; 0.19] | 0.14 [0.10; 0.20] | 0.14 [0.10; 0.18] | 0.26 |
| ADC 1000 relative deviation | 149.00 [108.00; 201.00] | 150.00 [109.00; 202.50] | 148.00 [106.00; 196.00] | 0.32 |

*ADC* apparent diffusion coefficient

Supplementary Table 2: Comparison of the ADC values between TNBC and non-TNBC in the primary cohort

| ADC values (mm2/s) | Total (n=963) | non-TNBC (n=771) | TNBC (n=192) | *p* value |
| --- | --- | --- | --- | --- |
| ADC 500 maximium | 1.73 [1.48; 2.04] | 1.73 [1.48; 2.02] | 1.72 [1.50; 2.05] | 0.551 |
| ADC 500 minimium | 0.75 [0.59; 0.91] | 0.74 [0.58; 0.91] | 0.77 [0.60; 0.92] | 0.249 |
| ADC 500 average | 1.10 [0.97; 1.27] | 1.09 [0.97; 1.26] | 1.14 [0.96; 1.28] | 0.450 |
| ADC 500 standard deviation | 0.18 [0.13; 0.25] | 0.18 [0.13; 0.25] | 0.19 [0.14; 0.25] | 0.124 |
| ADC 500 relative deviation | 161.00 [116.00; 228.00] | 160.00 [115.00; 231.00] | 165.50 [124.00; 215.00] | 0.537 |
| ADC 1000 maximium | 1.46 [1.25; 1.71] | 1.46 [1.25; 1.71] | 1.47 [1.26; 1.73] | 0.546 |
| ADC 1000 minimium | 0.67 [0.54; 0.80] | 0.66 [0.53; 0.79] | 0.69 [0.55; 0.82] | 0.123 |
| ADC 1000 average | 0.93 [0.83; 1.07] | 0.93 [0.83; 1.05] | 0.95 [0.82; 1.09] | 0.334 |
| ADC 1000 standard deviation | 0.14 [0.10; 0.20] | 0.14 [0.10; 0.20] | 0.14 [0.11; 0.20] | 0.792 |
| ADC 1000 relative deviation | 150.00 [109.00; 202.50] | 149.00 [109.00; 203.50] | 155.50 [110.75; 199.25] | 0.911 |

*TNBC* triple negative breast cancer*, non-TNBC* non-triple negative breast cancer *, ADC* apparent diffusion coefficient
